# Supplementary material for: Crown ether complexes of potassium quinolin-8-olates: synthesis, characterization and catalysis toward the ring-opening polymerization of rac-lactide
Source: Royal Society of Chemistry journal article supplement (doi:10.1039/c7ra01186e), 2017-01-01
Supplement: c7ra01186e1.pdf [file c7ra01186e1.pdf]

Electronic Supplementary Information

## Crown ether complexes of potassium quinolin-8-olates: synthesis, characterization and catalysis toward the ring-opening polymerization of *rac*-lactide

Bing-Bing Wu<sup>a</sup> and Zhong-Xia Wang<sup>\*,a,b</sup>

<sup>a</sup> CAS Key Laboratory of Soft Matter Chemistry and Department of Chemistry, University of Science and Technology of China, Hefei, Anhui 230026, People's Republic of China. Tel: 86 551 63603043; E-mail: zxwang@ustc.edu.cn.

<sup>b</sup> Collaborative Innovation Center of Chemical Science and Engineering (Tianjin), Tianjin 300072, People's Republic of China.

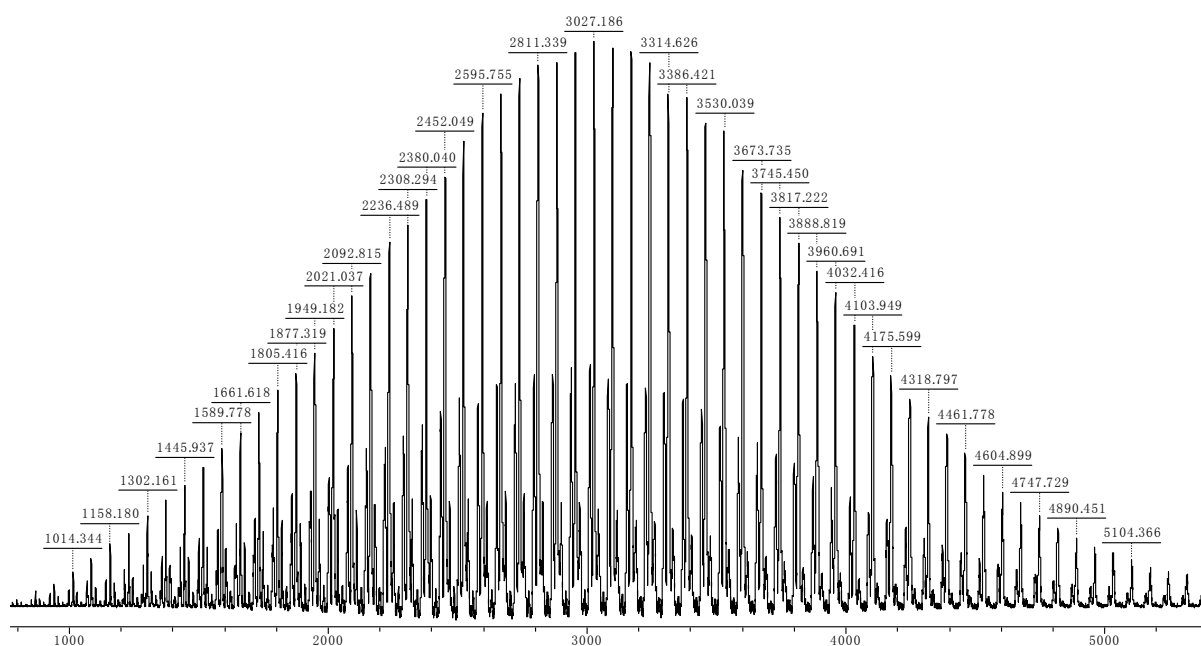

Figure S1. MALDI-TOF mass spectrum (matrix: DCTB) of the PLA initiated by 1-BnOH (Table 1, entry 7).

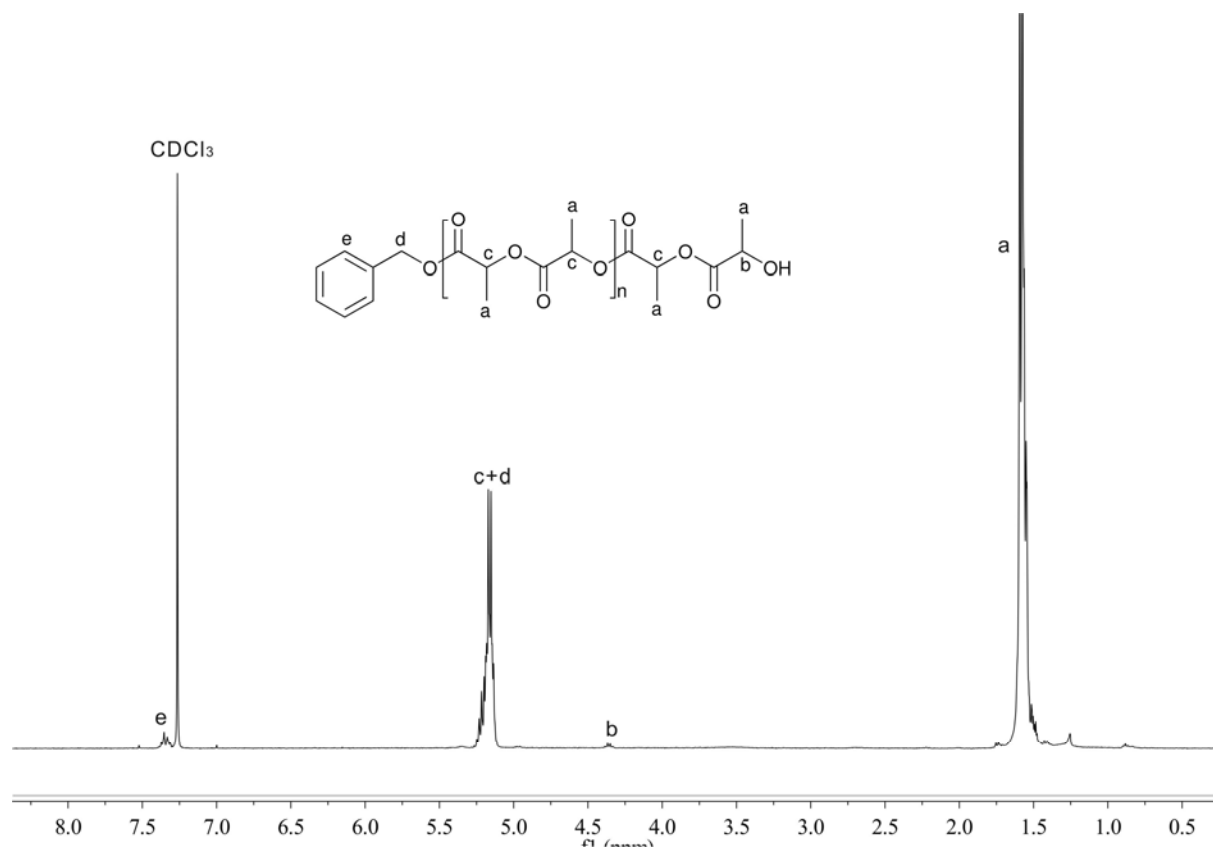

Figure S2. The  $^1\text{H}$  NMR spectrum of the PLA initiated by **1-BnOH** (Table 1, entry 12).
